# Supplementary material for: Red and blue luminescent metallo-supramolecular coordination polymers assembled through π–π interactions †
Source: Royal Society of Chemistry journal article supplement (doi:10.1039/b000871k), 2000-01-01
Supplement: b000871k.doc [file b000871k.doc]

**Figure Captions in electronic supplementary data.**

**Fig. 2pack** Packing of the cation chains in the complex [Co(biptpy)2][PF6]2; hydrogens omitted for clarity. Analogous packing is observed with ruthenium(II), nickel(II) and copper(II).

**Fig. 4** Structure of the cation chains in the complex [Cd(biptpy)2][PF6]2 (top) cation **1** (bottom) cation **2**; hydrogens omitted for clarity.

**Fig. 5** Packing of the cation chains in the complex [Cd(biptpy)2][PF6]2; hydrogens omitted for clarity. Red cation **1**, blue cation **2**.

**Fig. 5a** Packing of the cation chains in the complex [Cd(biptpy)2][PF6]2 using the colour schemes adopted for cations **1** and **2** in Fig.4; hydrogens omitted for clarity.

**Fig. 5b** Packing of the cation chains in the complex [Cd(biptpy)2][PF6]2 emphasising the packing of the chains: cations **1** red**,** cations **2** blue; hydrogens omitted for clarity

**Fig. 6** Structure of the complex cations [Zn(biptpy)2]2+; hydrogens omitted for clarity

**Fig. 7** Structure of the complex cation [Ru(biptpy)(tpy)]2+; hydrogens omitted for clarity

**Fig. 8** Packing of the complex cation [Ru(biptpy)(tpy)]2+ illustrating the formation of a network; hydrogens omitted for clarity
